# Supplementary material for: Safety, efficacy, and impact on gut microbial ecology of a Bifidobacterium longum subspecies infantis LMG11588 supplementation in healthy term infants: a randomized, double-blind, controlled trial in the Philippines
Source: PubMed Central journal article supplement (PMC10755859; doi:10.3389/fnut.2023.1319873), 2023-12-14
Supplement: Data_Sheet_3.pdf [file Data_Sheet_3.pdf]

**Supplementary Table 1. Descriptive statistics and adjusted comparisons of IGSQ-13 score among groups and by visit, FAS**

| Visit    | Group | Geometric means (SD) | Estimate <sup>a</sup> (95% CI) | Group comparisons |                            |                      |
|----------|-------|----------------------|--------------------------------|-------------------|----------------------------|----------------------|
|          |       |                      |                                | Comparison        | Ratio of estimate (95% CI) | p-value <sup>b</sup> |
| Baseline | CG    | 14.7 (1.1)           | n/a                            | n/a               | n/a                        | n/a                  |
|          | Lo-EG | 14.5 (1.1)           | n/a                            | n/a               | n/a                        | n/a                  |
|          | Hi-EG | 14.5 (1.1)           | n/a                            | n/a               | n/a                        | n/a                  |
| Visit 2  | CG    | 14.7 (1.1)           | 14.6 (14.2, 15.1)              | --                | --                         | --                   |
|          | Lo-EG | 14.7 (1.1)           | 14.7 (14.3, 15.1)              | Lo-EG vs CG       | 1.00 (0.96, 1.04)          | 0.944                |
|          | Hi-EG | 14.8 (1.2)           | 14.9 (14.4, 15.3)              | Hi-EG vs CG       | 1.01 (0.97, 1.06)          | 0.806                |
| Visit 3  | CG    | 14.0 (1.1)           | 13.9 (13.7, 14.2)              | --                | --                         | --                   |
|          | Lo-EG | 13.9 (1.1)           | 13.9 (13.7, 14.2)              | Lo-EG vs CG       | 1.00 (0.97, 1.03)          | 0.991                |
|          | Hi-EG | 13.9 (1.1)           | 13.9 (13.6, 14.2)              | Hi-EG vs CG       | 1.00 (0.97, 1.03)          | 0.991                |

ANCOVA, analysis of covariance; CG, control group (placebo supplement); FAS, full analysis set; IGSQ, Infant Gastrointestinal Symptom Questionnaire (IGSQ); Lo-EG, low-dose *B. infantis*,  $1.0 \times 10^8$  CFU; Hi-EG, high-dose *B. infantis*,  $1.8 \times 10^{10}$  CFU; SD, standard deviation; CI, confidence interval

<sup>a</sup> From an ANCOVA model correcting for baseline weight and sex.

<sup>b</sup> Adjusted p-values were calculated using Benjamini-Hochberg correction.

**Supplementary Table 2. GI tolerance outcomes by visit, FAS**

| Visit                                                         | Category  | CG (n=75)      | Lo-EG (n=73)   | Hi-EG ((n=70)  | Lo-EG v CG<br>p-value <sup>d</sup> | Hi-EG v CG<br>p-value <sup>d</sup> | Hi-EG v Lo-EG<br>p-value <sup>d</sup> |
|---------------------------------------------------------------|-----------|----------------|----------------|----------------|------------------------------------|------------------------------------|---------------------------------------|
| <b>Stool frequency<sup>ab</sup>, LS mean (95% CI)</b>         |           |                |                |                |                                    |                                    |                                       |
| Visit 2                                                       |           | 1.9 (1.6, 2.2) | 1.9 (1.6, 2.2) | 1.9 (1.6, 2.2) | 0.943                              | 0.943                              | 0.943                                 |
| Visit 3                                                       |           | 1.7 (1.5, 2.0) | 1.6 (1.3, 1.9) | 1.5 (1.2, 1.8) | 0.576                              | 0.576                              | 0.576                                 |
| <b>Stool consistency score<sup>ab</sup>, LS mean (95% CI)</b> |           |                |                |                |                                    |                                    |                                       |
| Visit 2                                                       |           | 2.9 (2.8, 3.0) | 2.9 (2.8, 3.0) | 2.8 (2.7, 2.9) | 0.742                              | 0.155                              | 0.161                                 |
| Visit 3                                                       |           | 2.8 (2.7, 3.0) | 2.8 (2.7, 2.9) | 2.8 (2.6, 2.9) | 0.754                              | 0.754                              | 0.754                                 |
| <b>Stool consistency<sup>a</sup>, N stools (%)</b>            |           |                |                |                |                                    |                                    |                                       |
| Visit 2                                                       | Watery    | 3 (0.7%)       | 4 (1.0%)       | 19 (4.9%)      | <b>0.021</b>                       | <b>&lt;0.0001</b>                  | <b>&lt;0.0001</b>                     |
|                                                               | Runny     | 82 (18.9%)     | 76 (18.4%)     | 103 (26.4%)    |                                    |                                    |                                       |
|                                                               | Soft      | 299 (68.7%)    | 309 (75.0%)    | 241 (61.8%)    |                                    |                                    |                                       |
|                                                               | Formed    | 48 (11.0%)     | 21 (5.1%)      | 27 (6.9%)      |                                    |                                    |                                       |
|                                                               | Hard      | 3 (0.7%)       | 2 (0.5%)       | 0 (0%)         |                                    |                                    |                                       |
| Visit 3                                                       | Watery    | 12 (3.1%)      | 8 (2.3%)       | 14 (4.5%)      | 0.490                              | 0.308                              | 0.490                                 |
|                                                               | Runny     | 73 (18.7%)     | 79 (22.6%)     | 74 (23.8%)     |                                    |                                    |                                       |
|                                                               | Soft      | 268 (68.7%)    | 235 (67.3%)    | 204 (65.6%)    |                                    |                                    |                                       |
|                                                               | Formed    | 33 (8.5%)      | 26 (7.4%)      | 19 (6.1%)      |                                    |                                    |                                       |
|                                                               | Hard      | 4 (1.0%)       | 1 (0.3%)       | 0 (0%)         |                                    |                                    |                                       |
| <b>Difficulty passing stool<sup>ac</sup>, N stools (%)</b>    |           |                |                |                |                                    |                                    |                                       |
| Visit 2                                                       |           | 6 (2.7%)       | 4 (1.8%)       | 2 (1.0%)       | 0.513                              | 0.495                              | 0.513                                 |
| Visit 3                                                       |           | 2 (0.9%)       | 1 (0.5%)       | 1 (0.5%)       | 0.915                              | 0.915                              | 0.956                                 |
| <b>Regurgitation/Vomiting, N reports (%)</b>                  |           |                |                |                |                                    |                                    |                                       |
| Visit 2                                                       | 0 times   | 97 (43.1%)     | 99 (45.2%)     | 117 (55.7%)    | 0.125                              | <b>0.031</b>                       | 0.052                                 |
|                                                               | 1 time    | 31 (13.8%)     | 42 (19.2%)     | 32 (15.2%)     |                                    |                                    |                                       |
|                                                               | 2-3 times | 72 (32.0%)     | 67 (30.6%)     | 46 (21.9%)     |                                    |                                    |                                       |
|                                                               | 4-6 times | 20 (8.9%)      | 9 (4.1%)       | 15 (7.1%)      |                                    |                                    |                                       |
|                                                               | 7 or more | 5 (2.2%)       | 2 (0.9%)       | 0 (0%)         |                                    |                                    |                                       |

| Visit                                              | Category  | CG (n=75)    | Lo-EG (n=73) | Hi-EG (n=70) | Lo-EG v CG<br>p-value <sup>d</sup> | Hi-EG v CG<br>p-value <sup>d</sup> | Hi-EG v Lo-EG<br>p-value <sup>d</sup> |
|----------------------------------------------------|-----------|--------------|--------------|--------------|------------------------------------|------------------------------------|---------------------------------------|
| <b>Regurgitation/Vomiting con't, N reports (%)</b> |           |              |              |              |                                    |                                    |                                       |
| Visit 3                                            | 0 times   | 142 (63.1%)  | 146 (66.7%)  | 136 (64.8%)  | <b>0.006</b>                       | <b>0.044</b>                       | <b>0.006</b>                          |
|                                                    | 1 time    | 26 (11.6%)   | 17 (7.8%)    | 36 (17.1%)   |                                    |                                    |                                       |
|                                                    | 2-3 times | 43 (19.1%)   | 55 (25.1%)   | 35 (16.7%)   |                                    |                                    |                                       |
|                                                    | 4-6 times | 12 (5.3%)    | 1 (0.5%)     | 3 (1.4%)     |                                    |                                    |                                       |
|                                                    | 7 or more | 2 (0.9%)     | 0 (0%)       | 0 (0%)       |                                    |                                    |                                       |
| <b>Flatulence, N reports (%)</b>                   |           |              |              |              |                                    |                                    |                                       |
| Visit 2                                            | 0 times   | 171 (76.0%)  | 182 (83.1%)  | 156 (74.3%)  | 0.087                              | 0.928                              | 0.087                                 |
|                                                    | 1 time    | 15 (6.7%)    | 15 (6.8%)    | 18 (8.6%)    |                                    |                                    |                                       |
|                                                    | 2-3 times | 32 (14.2%)   | 15 (6.8%)    | 31 (14.8%)   |                                    |                                    |                                       |
|                                                    | 4-6 times | 5 (2.2%)     | 7 (3.2%)     | 4 (1.9%)     |                                    |                                    |                                       |
|                                                    | 7 or more | 2 (0.9%)     | 0 (0%)       | 1 (0.5%)     |                                    |                                    |                                       |
| Visit 3                                            | 0 times   | 200 (88.9%)  | 200 (91.3%)  | 180 (85.7%)  | 0.141                              | 0.141                              | 0.243                                 |
|                                                    | 1 time    | 7 (3.1%)     | 11 (5.0%)    | 17 (8.1%)    |                                    |                                    |                                       |
|                                                    | 2-3 times | 18 (8.0%)    | 8 (3.7%)     | 12 (5.7%)    |                                    |                                    |                                       |
|                                                    | 4-6 times | 0 (0%)       | 0 (0%)       | 1 (0.5%)     |                                    |                                    |                                       |
|                                                    | 7 or more | 0 (0%)       | 0 (0%)       | 0 (0%)       |                                    |                                    |                                       |
| <b>Crying/fussiness, N reports (%)</b>             |           |              |              |              |                                    |                                    |                                       |
| Visit 2                                            | 0 times   | 224 (99.6%)  | 212 (96.8%)  | 205 (97.6%)  | 0.066                              | 0.133                              | 0.876                                 |
|                                                    | 1 time    | 1 (0.4%)     | 1 (0.5%)     | 1 (0.5%)     |                                    |                                    |                                       |
|                                                    | 2-3 times | 0 (0%)       | 6 (2.7%)     | 4 (1.9%)     |                                    |                                    |                                       |
| Visit 3                                            | 0 times   | 225 (100.0%) | 217 (99.1%)  | 210 (100.0%) | 0.485                              | n/a                                | 0.499                                 |
|                                                    | 1 time    | 0 (0%)       | 0 (0%)       | 0 (0%)       |                                    |                                    |                                       |
|                                                    | 2-3 times | 0 (0%)       | 2 (0.9%)     | 0 (0%)       |                                    |                                    |                                       |

CG, control group (placebo supplement); Lo-EG, low-dose *B. infantis*,  $1.0 \times 10^8$  CFU; Hi-EG, high-dose *B. infantis*,  $1.8 \times 10^{10}$  CFU; LS mean, least squares mean; CI, confidence interval. Includes all measurements in the 1 day prior to Visit 1 and in the 3-day period prior to Visits 2 and 3.

<sup>a</sup>Data were analyzed by ANCOVA and adjusted for baseline values.

<sup>b</sup>Average scores over the 1 day prior to baseline, or the three days prior to V2 and V3 were analyzed.

<sup>c</sup>Calculated as the percentage of days with difficulties passing stool divided by total number of days on study.

<sup>d</sup>Adjusted p-values were calculated using Benjamini-Hochberg correction.

**Supplementary Table 3. Physician-reported adverse events, FAS**

|                                          | CG (n=75)  |            | Lo-EG (n=73) |            | Hi-EG (n=70) |            |
|------------------------------------------|------------|------------|--------------|------------|--------------|------------|
|                                          | No. Events | N (%)      | No. Events   | N (%)      | No. Events   | N (%)      |
| <b>All adverse events</b>                | 38         | 32 (42.7%) | 33           | 27 (37.0%) | 34           | 27 (38.6%) |
| <b>Serious adverse events</b>            | 1          | 1 (1.3%)   | 0            | 0 (0%)     | 0            | 0 (0%)     |
| <b>Severity of Adverse Events</b>        |            |            |              |            |              |            |
| Mild                                     | 35         | 31 (41.3%) | 32           | 27 (37.0%) | 33           | 27 (38.6%) |
| Moderate                                 | 1          | 1 (1.3%)   | 1            | 1 (1.4%)   | 1            | 1 (1.4%)   |
| Severe                                   | 2          | 1 (1.3%)   | 0            | 0 (0%)     | 0            | 0 (0%)     |
| <b>Adverse events of interest, N (%)</b> |            |            |              |            |              |            |
| Upper respiratory infection              |            | 9 (12.0%)  |              | 3 (4.1%)   |              | 6 (8.6%)   |
| Lower respiratory infection              |            | 6 (8.0%)   |              | 5 (6.8%)   |              | 7 (10.0%)  |
| Otitis/ear infection                     |            | 0 (0%)     |              | 0 (0%)     |              | 0 (0%)     |
| Skin allergy                             |            | 1 (1.3%)   |              | 0 (0%)     |              | 0 (0%)     |
| GI-related/diarrhea                      |            | 0 (0%)     |              | 1 (1.4%)   |              | 0 (0%)     |

CG, control group (placebo supplement); Lo-EG, low-dose *B. infantis*,  $1.0 \times 10^8$  CFU; Hi-EG, high-dose *B. infantis*,  $1.8 \times 10^{10}$  CFU

**Supplementary Table 4. Parent reported symptoms, FAS**

| Symptom                                                               | CG<br>(n=75)<br>N (%) | Lo-EG<br>(n=73)<br>N (%) | Hi-EG1<br>(n=70)<br>N (%) | Lo-EG vs CG<br>p-value | Hi-EG vs<br>CG<br>p-value | Hi-EG vs Lo-<br>EG<br>p-value |
|-----------------------------------------------------------------------|-----------------------|--------------------------|---------------------------|------------------------|---------------------------|-------------------------------|
| <b>Fever<sup>a</sup></b>                                              | 16 (21.3%)            | 23 (31.5%)               | 18 (25.7%)                |                        | 0.369                     |                               |
| Duration <sup>b</sup>                                                 |                       |                          |                           |                        |                           |                               |
| 1 day                                                                 | 9 (12.0%)             | 13 (17.8%)               | 7 (10.0%)                 |                        |                           |                               |
| 2 days                                                                | 2 (2.7%)              | 6 (8.2%)                 | 4 (5.7%)                  | 0.746                  | 0.746                     | >0.99                         |
| 3 days                                                                | 1 (1.3%)              | 0 (0.0%)                 | 0 (0.0%)                  |                        |                           |                               |
| <b>Fever<sup>a</sup>, excluding vaccine-induced fever<sup>1</sup></b> | 5 (6.7%)              | 7 (9.6%)                 | 8 (11.4%)                 |                        | 0.604                     |                               |
| Duration <sup>b</sup>                                                 |                       |                          |                           |                        |                           |                               |
| 1 day                                                                 | 1 (1.3%)              | 3 (4.1%)                 | 1 (1.4%)                  |                        |                           |                               |
| 2 days                                                                | 0 (0%)                | 1 (1.4%)                 | 2 (2.9%)                  | >0.99                  | >0.99                     | >0.99                         |
| <b>Respiratory tract symptoms<sup>a,c</sup></b>                       | 17 (22.7%)            | 7 (9.6%)                 | 10 (14.3%)                |                        | 0.085                     |                               |
| Duration <sup>b</sup>                                                 |                       |                          |                           |                        |                           |                               |
| 2 days                                                                | 2 (2.7%)              | 1 (1.4%)                 | 0 (0%)                    |                        |                           |                               |
| 3 days                                                                | 5 (6.7%)              | 3 (4.1%)                 | 5 (7.1%)                  | >0.99                  | 0.705                     | 0.705                         |
| <b>Gastrointestinal symptoms<sup>a</sup></b>                          | 0 (0%)                | 1 (1.4%)                 | 1 (1.4%)                  |                        | 0.976                     |                               |
| Duration <sup>b</sup>                                                 |                       |                          |                           |                        |                           |                               |
| 3 days                                                                | 0 (0%)                | 1 (1.4%)                 | 1 (1.4%)                  | n/a                    | n/a                       | n/a                           |

CG, control group (placebo supplement); Lo-EG, low-dose *B. infantis*,  $1.0 \times 10^8$  CFU; Hi-EG, high-dose *B. infantis*,  $1.8 \times 10^{10}$  CFU.

<sup>a</sup> p-value from chi-square test comparing proportions between groups

<sup>b</sup> p-value from Fisher-Halton test comparing duration between pairwise groups. Adjusted using Benjamini-Hochberg correction. Symptom duration was available for the subset of symptoms confirmed by a PI.

<sup>c</sup> Predefined symptoms include cough, nasal congestion, sneezing, cackles/rales/wheezing, fever, difficulty breathing, hoarseness, rapid breathing, noisy breathing, and shallow breathing.

**Supplementary Table 5a. Fecal pH (wet feces) and organic acids (dry feces, umol/g) at visits 2 and 3, FAS population (all subjects)**

| Marker      | Visit   | Lo-EG v CG              |                         | Hi-EG v CG              |                  | Hi-EG vs Lo-EG |                  |                |              |       |
|-------------|---------|-------------------------|-------------------------|-------------------------|------------------|----------------|------------------|----------------|--------------|-------|
|             |         | CG<br>(n=75)            | Lo-EG<br>(n=73)         | Hi-EG<br>(n=70)         | Unadj<br>p-value | Adj<br>p-value | Unadj<br>p-value | Adj<br>p-value |              |       |
| Fecal pH    | Visit 2 | 5.38<br>(5.19, 5.57)    | 5.42<br>(5.22, 5.61)    | 5.10<br>(4.90, 5.30)    | 0.78             | 0.78           | <b>0.051</b>     | 0.076          | <b>0.027</b> | 0.076 |
|             | Visit 3 | 5.31<br>(5.06, 5.57)    | 5.36<br>(5.10, 5.61)    | 5.52<br>(5.25, 5.78)    | 0.82             | 0.82           | 0.28             | 0.59           | 0.39         | 0.59  |
| Acetate     | Visit 2 | 354.6<br>(313.6, 395.6) | 406.3<br>(365.3, 447.3) | 456.2<br>(414.3, 498.1) | 0.080            | 0.095          | <b>0.0008</b>    | <b>0.0023</b>  | 0.095        | 0.095 |
|             | Visit 3 | 437.1<br>(388.8, 485.5) | 481.5<br>(433.9, 529.1) | 469.7<br>(420.3, 519.2) | 0.20             | 0.53           | 0.35             | 0.53           | 0.74         | 0.74  |
| Butyrate    | Visit 2 | 26.3<br>(16.4, 36.3)    | 38.6<br>(28.7, 48.6)    | 31.5<br>(21.4, 41.7)    | 0.086            | 0.26           | 0.47             | 0.47           | 0.32         | 0.47  |
|             | Visit 3 | 33.1<br>(22.7, 43.4)    | 42.2<br>(32.0, 52.4)    | 42.8<br>(32.2, 53.4)    | 0.22             | 0.32           | 0.20             | 0.32           | 0.94         | 0.94  |
| Isobutyrate | Visit 2 | 5.91<br>(3.97, 7.85)    | 5.89<br>(3.97, 7.81)    | 5.85<br>(3.71, 8.00)    | 0.99             | 0.99           | 0.97             | 0.99           | 0.98         | 0.99  |
|             | Visit 3 | 7.19<br>(4.87, 9.52)    | 5.68<br>(3.58, 7.78)    | 6.96<br>(4.78, 9.14)    | 0.34             | 0.61           | 0.89             | 0.89           | 0.41         | 0.61  |
| Isovalerate | Visit 2 | 2.10<br>(1.52, 2.69)    | 2.52<br>(1.94, 3.11)    | 1.90<br>(1.31, 2.50)    | 0.32             | 0.47           | 0.64             | 0.64           | 0.14         | 0.43  |
|             | Visit 3 | 2.53<br>(1.70, 3.35)    | 3.28<br>(2.46, 4.09)    | 2.88<br>(2.03, 3.72)    | 0.21             | 0.56           | 0.56             | 0.56           | 0.50         | 0.56  |
| Propionate  | Visit 2 | 71.4<br>(57.1, 85.7)    | 68.5<br>(54.2, 82.8)    | 65.0<br>(50.3, 79.6)    | 0.78             | 0.78           | 0.53             | 0.78           | 0.73         | 0.78  |
|             | Visit 3 | 81.0<br>(63.0, 99.0)    | 80.8<br>(63.1, 98.6)    | 87.4<br>(69.0, 105.8)   | 0.99             | 0.99           | 0.63             | 0.94           | 0.62         | 0.94  |
| Valerate    | Visit 2 | 2.61<br>(1.37, 3.84)    | 4.37<br>(3.13, 5.60)    | 3.18<br>(1.91, 4.44)    | <b>0.048</b>     | 0.14           | 0.52             | 0.52           | 0.19         | 0.28  |
|             | Visit 3 | 2.61<br>(1.37, 3.84)    | 4.37<br>(3.13, 5.60)    | 5.43<br>(3.71, 7.16)    | 0.42             | 0.53           | 0.16             | 0.47           | 0.53         | 0.53  |

CG, control group (placebo supplement); Lo-EG, low-dose *B. infantis*,  $1.0 \times 10^8$  CFU; Hi-EG, high-dose *B. infantis*,  $1.8 \times 10^{10}$  CFU. Data presented are LS mean (95% Confidence Interval) from ANCOVA model adjusted for baseline value. P-value from ANCOVA adjusted for baseline value. P-values are uncorrected.

**Supplementary Table 5b.** Fecal pH (wet feces) and organic acids (dry feces, umol/g) at visits 2 and 3, FAS population (breastfed only subjects)

| Marker      | Visit   | Lo-EG v CG              |                         | Hi-EG v CG              |                  | Hi-EG vs Lo-EG |                  |                |              |      |
|-------------|---------|-------------------------|-------------------------|-------------------------|------------------|----------------|------------------|----------------|--------------|------|
|             |         | CG<br>(n=42)            | Lo-EG<br>(n=42)         | Hi-EG<br>(n=41)         | Unadj<br>p-value | Adj<br>p-value | Unadj<br>p-value | Adj<br>p-value |              |      |
| Fecal pH    | Visit 2 | 5.21<br>(4.99, 5.42)    | 5.03<br>(4.81, 5.24)    | 4.88<br>(4.67, 5.10)    | 0.24             | 0.36           | <b>0.037</b>     | 0.12           | 0.36         | 0.36 |
|             | Visit 3 | 5.06<br>(4.75, 5.37)    | 4.96<br>(4.65, 5.27)    | 5.15<br>(4.84, 5.46)    | 0.64             | 0.69           | 0.69             | 0.69           | 0.39         | 0.69 |
| Acetate     | Visit 2 | 339.2<br>(283.0, 395.3) | 414.1<br>(358.7, 469.6) | 467.0<br>(410.1, 523.8) | 0.063            | 0.094          | <b>0.002</b>     | <b>0.0059</b>  | 0.19         | 0.19 |
|             | Visit 3 | 394.6<br>(328.6, 460.5) | 498.3<br>(434.5, 562.1) | 490.8<br>(425.3, 556.4) | <b>0.028</b>     | 0.066          | <b>0.044</b>     | 0.066          | 0.87         | 0.87 |
| Butyrate    | Visit 2 | 24.6<br>(13.6, 35.6)    | 23.8<br>(12.9, 34.7)    | 26.0<br>(14.9, 37.2)    | 0.92             | 0.92           | 0.85             | 0.92           | 0.78         | 0.92 |
|             | Visit 3 | 28.5<br>(15.2, 41.8)    | 32.3<br>(19.4, 45.3)    | 36.0<br>(22.8, 49.3)    | 0.68             | 0.69           | 0.43             | 0.69           | 0.69         | 0.69 |
| Isobutyrate | Visit 2 | 4.12<br>(2.26, 5.97)    | 3.63<br>(1.59, 5.66)    | 5.70<br>(3.32, 8.08)    | 0.72             | 0.72           | 0.29             | 0.44           | 0.19         | 0.44 |
|             | Visit 3 | 3.62<br>(1.34, 5.90)    | 2.73<br>(0.20, 5.26)    | 6.35<br>(4.12, 8.58)    | 0.60             | 0.60           | 0.092            | 0.14           | <b>0.039</b> | 0.12 |
| Isovalerate | Visit 2 | 1.55<br>(1.02, 2.08)    | 1.56<br>(1.04, 2.09)    | 1.50<br>(0.96, 2.04)    | 0.98             | 0.98           | 0.89             | 0.98           | 0.87         | 0.98 |
|             | Visit 3 | 1.83<br>(0.86, 2.81)    | 2.47<br>(1.51, 3.42)    | 2.51<br>(1.53, 3.49)    | 0.36             | 0.54           | 0.34             | 0.54           | 0.95         | 0.95 |
| Propionate  | Visit 2 | 40.6<br>(25.7, 55.5)    | 51.6<br>(36.9, 66.3)    | 33.6<br>(18.5, 48.7)    | 0.30             | 0.45           | 0.51             | 0.51           | 0.092        | 0.28 |
|             | Visit 3 | 44.8<br>(28.0, 61.6)    | 47.2<br>(30.9, 63.6)    | 66.6<br>(49.8, 83.4)    | 0.84             | 0.84           | 0.071            | 0.16           | 0.10         | 0.16 |
| Valerate    | Visit 2 | 2.48<br>(1.29, 3.67)    | 2.62<br>(1.44, 3.80)    | 2.65<br>(1.45, 3.86)    | 0.87             | 0.97           | 0.84             | 0.97           | 0.97         | 0.97 |
|             | Visit 3 | 3.32<br>(1.32, 5.33)    | 3.59<br>(1.64, 5.55)    | 5.10<br>(3.10, 7.10)    | 0.85             | 0.85           | 0.22             | 0.43           | 0.29         | 0.43 |

CG, control group (placebo supplement); Lo-EG, low-dose *B. infantis*,  $1.0 \times 10^8$  CFU; Hi-EG, high-dose *B. infantis*,  $1.8 \times 10^{10}$  CFU. Data presented are LS mean (95% Confidence Interval) from ANCOVA model adjusted for baseline value. P-value from ANCOVA adjusted for baseline value. Adjusted p-values were calculated using Benjamini-Hochberg correction.

**Supplementary Table 6. Fecal biomarkers (dry feces) at visits 2 and 3, FAS population**

| Marker                         | Visit   | CG                            | Lo-EG                         | Hi-EG                         | Lo-EG v CG    |             | Hi-EG v CG    |              | Hi-EG vs Lo-EG |             |
|--------------------------------|---------|-------------------------------|-------------------------------|-------------------------------|---------------|-------------|---------------|--------------|----------------|-------------|
|                                |         |                               |                               |                               | Unadj p-value | Adj p-value | Unadj p-value | Adj p-value  | Unadj p-value  | Adj p-value |
| <b>All Subjects</b>            |         |                               |                               |                               |               |             |               |              |                |             |
| Alpha-1-Antitrypsin (mg/g)     | Visit 2 | 2.20<br>(1.68, 2.72)          | 2.81<br>(2.29, 3.33)          | 3.14<br>(2.61, 3.67)          | 0.11          | 0.16        | <b>0.014</b>  | <b>0.042</b> | 0.38           | 0.38        |
|                                | Visit 3 | 4.34<br>(3.55, 5.13)          | 5.13<br>(4.33, 5.94)          | 4.16<br>(3.35, 4.97)          | 0.17          | 0.25        | 0.75          | 0.75         | 0.094          | 0.25        |
| Calprotectin (mg/kg)           | Visit 2 | 1624.5<br>(1260.1, 1989.0)    | 1433.2<br>(1065.8, 1800.5)    | 1464.3<br>(1079.1, 1829.5)    | 0.47          | 0.78        | 0.52          | 0.78         | 0.94           | 0.94        |
|                                | Visit 3 | 2307.9<br>(1708.1, 2907.8)    | 2548.2<br>(1935.0, 3161.3)    | 2866.7<br>(2269.1, 3504.3)    | 0.58          | 0.58        | 0.19          | 0.56         | 0.44           | 0.58        |
| sIgA (mg/kg)                   | Visit 2 | 44445.8<br>(34325.2, 54566.4) | 50550.3<br>(40360.9, 60739.7) | 53841.8<br>(43436.0, 64247.6) | 0.40          | 0.60        | 0.20          | 0.60         | 0.66           | 0.66        |
|                                | Visit 3 | 56355.2<br>(45366.4, 67344.0) | 61438.7<br>(50220.2, 72657.2) | 56756.7<br>(45457.9, 68055.5) | 0.52          | 0.84        | 0.96          | 0.96         | 0.56           | 0.84        |
| <b>Breastfed only Subjects</b> |         |                               |                               |                               |               |             |               |              |                |             |
| Alpha-1-Antitrypsin (mg/g)     | Visit 2 | 2.147<br>(1.366, 2.928)       | 3.165<br>(2.393, 3.938)       | 3.378<br>(2.598, 4.159)       | 0.069         | 0.10        | <b>0.029</b>  | 0.087        | 0.70           | 0.70        |
|                                | Visit 3 | 4.369<br>(3.165, 5.572)       | 5.915<br>(4.709, 7.120)       | 4.279<br>(3.075, 5.484)       | 0.060         | 0.11        | 0.92          | 0.92         | 0.075          | 0.11        |
| Calprotectin (mg/kg)           | Visit 2 | 1503.3<br>(1100.7, 1906.0)    | 1322.4<br>(924.3, 1720.4)     | 1122.7<br>(719.6, 1525.7)     | 0.53          | 0.53        | 0.19          | 0.53         | 0.49           | 0.53        |
|                                | Visit 3 | 2313.0<br>(1389.0, 3236.9)    | 2788.2<br>(1863.7, 3712.8)    | 2968.2<br>(2043.3, 3893.0)    | 0.47          | 0.71        | 0.32          | 0.71         | 0.79           | 0.79        |
| sIgA (mg/kg)                   | Visit 2 | 53339.5<br>(38771.9, 67907.1) | 64608.1<br>(50229.2, 78986.9) | 60772.2<br>(46217.2, 75327.1) | 0.28          | 0.71        | 0.48          | 0.71         | 0.71           | 0.71        |
|                                | Visit 3 | 69966.2<br>(535972, 863353)   | 76733.3<br>(603802, 930863)   | 65054.7<br>(48700.8, 81408.5) | 0.56          | 0.68        | 0.68          | 0.68         | 0.32           | 0.68        |

CG, control group (placebo supplement); Lo-EG, low-dose *B. infantis*,  $1.0 \times 10^8$  CFU; Hi-EG, high-dose *B. infantis*,  $1.8 \times 10^{10}$  CFU. Data presented LS mean (95% Confidence Interval) from ANCOVA model adjusted for baseline value. Adjusted p-values were calculated using Benjamini-Hochberg correction.



**Supplementary Table 7. Descriptive statistics for cytokines at visits 2 and 3, FAS population, all subjects**

| Marker       | Visit   | CG<br>(n=75)                         | Lo-EG<br>(n=73)                      | Hi-EG<br>(n=70)                      |
|--------------|---------|--------------------------------------|--------------------------------------|--------------------------------------|
|              |         | % out of range<br>Median<br>[Q1, Q3] | % out of range<br>Median<br>[Q1, Q3] | % out of range<br>Median<br>[Q1, Q3] |
| IFN-β        | Visit 2 | 56.0%<br>2.87<br>[1.79, 5.41]        | 37.0%<br>2.10<br>[1.12, 4.09]        | 55.7%<br>2.02<br>[1.03, 3.42]        |
|              | Visit 3 | 37.3%<br>2.06<br>[1.06, 3.81]        | 38.4%<br>3.07<br>[1.49, 3.81]        | 50.0%<br>1.98<br>[0.82, 5.45]        |
| IFN-γ        | Visit 2 | 30.7%<br>0.53<br>[0.34, 1.34]        | 34.2%<br>0.42<br>[0.24, 0.78]        | 38.6%<br>0.40<br>[0.28, 0.60]        |
|              | Visit 3 | 24.0%<br>0.62<br>[0.36, 1.12]        | 21.9%<br>0.57<br>[0.29, 1.14]        | 35.7%<br>0.55<br>[0.29, 0.82]        |
| IL-10        | Visit 2 | 98.7%<br>0.32<br>[0.32, 0.32]        | 90.4%<br>0.04<br>[0.04, 0.05]        | 97.1%<br>0.03<br>[0.03, 0.04]        |
|              | Visit 3 | 89.3%<br>0.09<br>[0.05, 0.10]        | 83.6%<br>0.05<br>[0.03, 0.09]        | 85.7%<br>0.08<br>[0.03, 0.14]        |
| IL-13        | Visit 2 | 85.3%<br>0.55<br>[0.47, 0.68]        | 86.3%<br>0.54<br>[0.37, 0.93]        | 81.4%<br>0.59<br>[0.40, 0.78]        |
|              | Visit 3 | 80.0%<br>0.83<br>[0.56, 1.10]        | 79.5%<br>0.54<br>[0.43, 0.63]        | 81.4%<br>0.83<br>[0.55, 0.85]        |
| IL-17A Gen.B | Visit 2 | 72.0%<br>1.17<br>[0.63, 1.78]        | 68.5%<br>0.94<br>[0.55, 1.43]        | 81.4%<br>0.83<br>[0.72, 0.89]        |
|              | Visit 3 | 68.0%<br>0.85<br>[0.53, 1.27]        | 68.5%<br>0.78<br>[0.67, 1.07]        | 75.7%<br>0.75<br>[0.54, 1.16]        |
| IL-1β        | Visit 2 | 5.3%<br>1.834<br>[0.63, 4.83]        | 2.7%<br>1.39<br>[0.40, 3.13]         | 11.4%<br>0.97<br>[0.46, 2.71]        |
|              | Visit 3 | 8.0%<br>1.12<br>[0.33, 4.31]         | 12.3%<br>0.92<br>[0.39, 2.62]        | 10.0%<br>0.68<br>[0.21, 2.85]        |
| IL-6         | Visit 2 | 86.7%<br>0.10<br>[0.06, 0.13]        | 82.2%<br>0.09<br>[0.07, 0.11]        | 77.1%<br>0.11<br>[0.06, 0.16]        |
|              | Visit 3 | 69.3%<br>0.12<br>[0.08, 0.18]        | 61.6%<br>0.09<br>[0.07, 0.16]        | 62.9%<br>0.08<br>[0.07, 0.13]        |
| IL-8         | Visit 2 | 8.0%<br>1.68<br>[0.49, 3.71]         | 12.3%<br>0.85<br>[0.38, 1.97]        | 5.7%<br>0.81<br>[0.42, 3.17]         |
|              | Visit 3 | 14.7%<br>1.59<br>[0.57, 5.15]        | 4.1%<br>0.95<br>[0.42, 2.62]         | 5.7%<br>1.16<br>[0.49, 3.46]         |
| IL-21        | Visit 2 | 56.0%<br>3.86<br>[2.86, 5.44]        | 64.4%<br>2.92<br>[2.46, 4.10]        | 57.1%<br>3.16<br>[2.30, 3.50]        |
|              | Visit 3 | 62.7%<br>3.82<br>[2.64, 4.62]        | 67.1%<br>3.09<br>[2.26, 4.05]        | 61.4%<br>2.72<br>[2.02, 4.25]        |
| IL-22        | Visit 2 | 94.7%<br>1.20<br>[0.60, 2.54]        | 100%<br>0.37<br>[0.24, 0.50]         | 95.7%<br>0.25<br>[0.24, 0.77]        |
|              | Visit 3 | 88.0%<br>0.59<br>[0.42, 1.09]        | 94.5%<br>0.37<br>[0.24, 0.50]        | 97.1%<br>0.88<br>[0.37, 1.40]        |
| IL-23        | Visit 2 | 25.3%<br>1.91<br>[1.39, 2.74]        | 43.8%<br>2.13<br>[1.60, 3.38]        | 31.4%<br>2.06<br>[1.35, 3.66]        |

| Marker         | Visit   | CG<br>(n=75)                         | Lo-EG<br>(n=73)                      | Hi-EG<br>(n=70)                      |
|----------------|---------|--------------------------------------|--------------------------------------|--------------------------------------|
|                |         | % out of range<br>Median<br>[Q1, Q3] | % out of range<br>Median<br>[Q1, Q3] | % out of range<br>Median<br>[Q1, Q3] |
| IL-27          | Visit 3 | 26.7%<br>1.87<br>[1.46, 2.69]        | 27.4%<br>2.34<br>[1.34, 3.78]        | 30.0%<br>1.68<br>[1.24, 2.56]        |
|                | Visit 2 | 38.7%<br>19.23<br>[15.10, 51.18]     | 32.9%<br>17.73<br>[12.48, 31.46]     | 30.0%<br>17.49<br>[12.11, 28.52]     |
|                | Visit 3 | 32.0%<br>18.31<br>[10.66, 31.42]     | 27.4%<br>14.47<br>[10.26, 23.77]     | 38.6%<br>12.85<br>[8.68, 21.88]      |
| IL-31          | Visit 2 | 98.7%<br>1.33<br>[1.33, 1.33]        | 98.6%<br>0.87<br>[0.87, 0.87]        | 95.7%<br>0.62<br>[0.53, 0.90]        |
|                | Visit 3 | 96.0%<br>0.48<br>[0.48, 0.48]        | 97.3%<br>0.48<br>[0.48, 0.48]        | 100%<br>0.48<br>[0.48, 0.48]         |
| IL-33          | Visit 2 | 93.3%<br>0.10<br>[0.07, 0.43]        | 84.9%<br>1.11<br>[0.06, 0.12]        | 84.3%<br>0.09<br>[0.07, 0.20]        |
|                | Visit 3 | 73.3%<br>0.22<br>[0.11, 0.30]        | 64.4%<br>0.17<br>[0.09, 0.31]        | 81.4%<br>0.22<br>[0.14, 0.48]        |
| MIP-3 $\alpha$ | Visit 2 | 65.3%<br>1.33<br>[1.07, 3.02]        | 60.3%<br>1.09<br>[0.80, 2.50]        | 60.0%<br>1.06<br>[0.71, 1.50]        |
|                | Visit 3 | 69.3%<br>1.35<br>[0.94, 1.90]        | 56.2%<br>1.36<br>[1.11, 1.93]        | 75.7%<br>0.735<br>[0.64, 0.95]       |
| TNF- $\alpha$  | Visit 2 | 73.3%<br>0.08<br>[0.07, 0.12]        | 58.9%<br>0.11<br>[0.08, 0.1.6]       | 67.1%<br>0.12<br>[0.11, 0.17]        |
|                | Visit 3 | 54.7%<br>0.14<br>[0.10, 0.19]        | 58.9%<br>0.14<br>[0.10, 0.20]        | 58.6%<br>0.13<br>[0.10, 0.15]        |

Units: pg/mg; CG, control group (placebo supplement); Lo-EG, low-dose *B. infantis*,  $1.0 \times 10^8$  CFU; Hi-EG, high-dose *B. infantis*,  $1.8 \times 10^{10}$  CFU.

**Supplementary Table 8. ANCOVA results for cytokines with at least 50% of values above limit of detection at visits 2 and 3, FAS population, all subjects and breastfed only subjects**

| Marker                         | Visit   | Lo-EG v CG                  |                    |                  | Hi-EG v CG                  |                    |                  | Hi-EG v Lo-EG               |                    |                  |
|--------------------------------|---------|-----------------------------|--------------------|------------------|-----------------------------|--------------------|------------------|-----------------------------|--------------------|------------------|
|                                |         | LS mean difference (95% CI) | Unadjusted p-value | Adjusted p-value | LS mean difference (95% CI) | Unadjusted p-value | Adjusted p-value | LS mean difference (95% CI) | Unadjusted p-value | Adjusted p-value |
| <b>All subjects</b>            |         |                             |                    |                  |                             |                    |                  |                             |                    |                  |
| IFN- $\gamma$                  | Visit 2 | -0.067<br>(-3.48, 3.34)     | 0.97               | 0.97             | 1.87<br>(-1.59, 5.33)       | 0.29               | 0.43             | 1.94<br>(-1.58, 5.45)       | 0.28               | 0.43             |
|                                | Visit 3 | -0.11<br>(-0.90, 0.69)      | 0.79               | 0.79             | -0.61<br>(-1.43, 0.20)      | 0.14               | 0.34             | -0.51<br>(-1.33, 0.32)      | 0.23               | 0.34             |
| IL-1 $\beta$                   | Visit 2 | -2.05<br>(-4.48, 0.38)      | 0.097              | 0.15             | -2.83<br>(-5.40, -0.26)     | <b>0.031</b>       | 0.09             | -0.78<br>(-3.31, 1.75)      | 0.54               | 0.54             |
|                                | Visit 3 | -2.29<br>(-5.11, 0.52)      | 0.11               | 0.33             | -1.69<br>(-4.54, 1.16)      | 0.24               | 0.37             | 0.60<br>(-2.29, 3.49)       | 0.68               | 0.68             |
| IL-8                           | Visit 2 | -1.52<br>(-4.00, 0.96)      | 0.23               | 0.52             | -0.33<br>(-2.72, 2.06)      | 0.78               | 0.78             | 1.19<br>(-1.30, 3.68)       | 0.35               | 0.52             |
|                                | Visit 3 | -1.84<br>(-5.42, 1.74)      | 0.31               | 0.47             | -0.003<br>(-3.49, 3.49)     | >0.99              | >0.99            | 1.84<br>(-1.67, 5.34)       | 0.30               | 0.47             |
| IL-23                          | Visit 2 | 2.90<br>(-3.48, 9.27)       | 0.37               | 0.55             | -0.56<br>(-6.55, 5.44)      | 0.85               | 0.85             | -3.45<br>(-9.63, 2.72)      | 0.27               | 0.55             |
|                                | Visit 3 | -3.84<br>(-10.96, 3.29)     | 0.29               | 0.68             | -1.47<br>(-8.43, 5.49)      | 0.68               | 0.68             | 2.36<br>(-4.23, 8.96)       | 0.48               | 0.68             |
|                                | Visit 2 | -10.87<br>(-29.69, 7.94)    | 0.25               | 0.42             | -10.39<br>(-29.31, 8.53)    | 0.28               | 0.42             | 0.48<br>(-18.24, 19.20)     | 0.96               | 0.96             |
| IL-27                          | Visit 3 | -8.71<br>(-30.46, 13.05)    | 0.43               | 0.55             | -15.53<br>(-38.43, 7.36)    | 0.18               | 0.54             | -6.82<br>(-29.50, 15.80)    | 0.55               | 0.55             |
| <b>Breastfed only subjects</b> |         |                             |                    |                  |                             |                    |                  |                             |                    |                  |
| IFN- $\gamma$                  | Visit 2 | -0.24<br>(-5.52, 5.03)      | 0.93               | 0.93             | 3.00<br>(-2.34, 8.34)       | 0.27               | 0.40             | 3.24<br>(-2.27, 8.75)       | 0.25               | 0.40             |
|                                | Visit 3 | -0.82<br>(-1.75, 0.10)      | 0.080              | 0.12             | -0.87<br>(-1.80, 0.07)      | 0.070              | 0.12             | -0.04<br>(-1.01, 0.92)      | 0.93               | 0.93             |
| IL-1 $\beta$                   | Visit 2 | -5.77<br>(-9.19, -2.35)     | <b>0.0011</b>      | <b>0.0034</b>    | -4.73<br>(-8.28, -1.18)     | <b>0.0095</b>      | <b>0.014</b>     | 1.04<br>(-2.39, 4.47)       | 0.55               | 0.55             |
|                                | Visit 3 | -3.17<br>(-5.90, -0.45)     | <b>0.023</b>       | <b>0.035</b>     | -3.97<br>(-6.71, -1.23)     | <b>0.0050</b>      | <b>0.015</b>     | -0.80<br>(-3.50, 1.90)      | 0.56               | 0.56             |
| IL-8                           | Visit 2 | -3.39<br>(-7.10, 0.32)      | 0.073              | 0.22             | -1.38<br>(-4.92, 2.16)      | 0.44               | 0.44             | 2.01<br>(-1.61, 5.63)       | 0.27               | 0.41             |
|                                | Visit 3 | -5.47<br>(-9.53, -1.41)     | <b>0.0087</b>      | <b>0.026</b>     | -4.09<br>(-7.99, -0.18)     | <b>0.041</b>       | 0.061            | 1.39<br>(-2.48, 5.26)       | 0.48               | 0.48             |
| IL-23                          | Visit 2 | -2.23<br>(-5.47, 1.01)      | 0.17               | 0.32             | -2.00<br>(-5.18, 1.19)      | 0.21               | 0.32             | 0.23<br>(-2.80, 3.26)       | 0.88               | 0.88             |
|                                | Visit 3 | -0.55<br>(-10.85, 9.75)     | 0.92               | 0.92             | 3.87<br>(-6.62, 4.35)       | 0.46               | 0.69             | 4.41<br>(-5.06, 3.89)       | 0.35               | 0.69             |
|                                | Visit 2 | -8.01<br>(-34.05, 18.03)    | 0.54               | 0.78             | -11.73<br>(-38.47, 15.01)   | 0.38               | 0.78             | -3.72<br>(-30.15, 22.71)    | 0.78               | 0.78             |
| IL-27                          | Visit 3 | -11.64<br>(-43.64, 20.37)   | 0.47               | 0.71             | -17.07<br>(-53.20, 19.06)   | 0.35               | 0.71             | -5.43<br>(-41.46, 30.60)    | 0.76               | 0.76             |

CG, control group (placebo supplement); Lo-EG, low-dose *B. infantis*,  $1.0 \times 10^8$  CFU; Hi-EG, high-dose *B. infantis*,  $1.8 \times 10^{10}$  CFU. ANCOVA includes adjustment for baseline value. Adjusted p-values were calculated using Benjamini-Hochberg correction.

**Supplementary Table 9. Statistical summary of group alpha diversity differences for gene, MGS, and genus-level richness.**

| Visit   | Taxonomical level | Diversity measure | CG Median [Q1, Q3]      | Lo-EG Median [Q1, Q3]   | Hi-EG Median [Q1, Q3]  | Kruskal-Wallis p-value | Dunn's p-value CG Lo-EG | Dunn's p-value CG Hi-EG | Dunn's p-value Lo-EG Hi-EG |
|---------|-------------------|-------------------|-------------------------|-------------------------|------------------------|------------------------|-------------------------|-------------------------|----------------------------|
| Visit 1 | Gene              | Richness          | 95871 [78841, 120174]   | 101899 [76456, 123403]  | 101519 [74321, 126164] | 0.843                  | n/a                     | n/a                     | n/a                        |
|         |                   | Shannon           | 10.2 [10.0, 10.6]       | 10.2 [9.7, 10.5]        | 10.2 [9.7, 10.5]       | 0.687                  | n/a                     | n/a                     | n/a                        |
|         | MGS               | Richness          | 41 [33, 51]             | 42 [33, 55]             | 43 [30, 54]            | 0.981                  | n/a                     | n/a                     | n/a                        |
|         |                   | Shannon           | 1.9 [1.6, 2.2]          | 1.9 [1.5, 2.2]          | 1.9 [1.5, 2.2]         | 0.508                  | n/a                     | n/a                     | n/a                        |
|         |                   | Faith's PD        | 19.5 [15.3, 23.3]       | 19.6 [15.4, 23.1]       | 19.6 [15, 25]          | 0.894                  | n/a                     | n/a                     | n/a                        |
|         | Genus             | Richness          | 17 [14, 21]             | 17 [14, 21]             | 18 [14, 23]            | 0.754                  | n/a                     | n/a                     | n/a                        |
| Shannon |                   | 1.5 [1.2, 1.7]    | 1.3 [1, 1.7]            | 1.4 [0.9, 1.7]          | 0.401                  | n/a                    | n/a                     | n/a                     |                            |
| Visit 2 | Gene              | Richness          | 109237 [90153, 139724]  | 103989 [78010, 130565]  | 96739 [71156, 128602]  | 0.234                  | n/a                     | n/a                     | n/a                        |
|         |                   | Shannon           | 10.2 [9.9, 10.5]        | 10.1 [9.6, 10.4]        | 10 [9.5, 10.4]         | 0.074                  | n/a                     | n/a                     | n/a                        |
|         | MGS               | Richness          | 51 [40, 61]             | 47 [37, 61]             | 47 [33, 58]            | 0.434                  | n/a                     | n/a                     | n/a                        |
|         |                   | Shannon           | 1.9 [1.6, 2.2]          | 1.8 [1.4, 2.2]          | 1.7 [1.3, 2.1]         | 0.400                  | n/a                     | n/a                     | n/a                        |
|         |                   | Faith's PD        | 23.6 [18.9, 27.1]       | 22.5 [17.3, 28.7]       | 23.6 [17.8, 26.6]      | 0.984                  | n/a                     | n/a                     | n/a                        |
|         | Genus             | Richness          | 22 [17, 25]             | 20 [16, 26]             | 21 [14, 25]            | 0.524                  | n/a                     | n/a                     | n/a                        |
| Shannon |                   | 1.3 [1.0, 1.7]    | 1.1 [0.6, 1.5]          | 1.0 [0.7, 1.6]          | <b>0.00521</b>         | <b>0.0045</b>          | <b>0.00602</b>          | 0.895                   |                            |
| Visit 3 | Gene              | Richness          | 110780 [88167, 132630]  | 109606 [92956, 138893]  | 119724 [91470, 138967] | 0.510                  | n/a                     | n/a                     | n/a                        |
|         |                   | Shannon           | 10 [9.7, 10.4]          | 10.2 [9.8, 10.4]        | 10.1 [9.7, 10.5]       | 0.310                  | n/a                     | n/a                     | n/a                        |
|         | MGS               | Richness          | 51 [38, 64]             | 53 [41, 69]             | 56 [43, 70]            | 0.415                  | n/a                     | n/a                     | n/a                        |
|         |                   | Shannon           | 1.7 [1.4, 2.1]          | 1.9 [1.4, 2.2]          | 1.8 [1.4, 2.3]         | 0.468                  | n/a                     | n/a                     | n/a                        |
|         |                   | Faith's PD        | 24.7 [18.9, 29.3]       | 25.7 [19.5, 30.5]       | 24.3 [20.3, 31.1]      | 0.383                  | n/a                     | n/a                     | n/a                        |
|         | Genus             | Richness          | 24 [17, 28]             | 23 [17, 28]             | 23 [18, 29]            | 0.522                  | n/a                     | n/a                     | n/a                        |
| Shannon |                   | 1.2 [0.9, 1.6]    | 1.2 [0.7, 1.5]          | 1.1 [0.8, 1.6]          | 0.394                  | n/a                    | n/a                     | n/a                     |                            |
| Visit 4 | Gene              | Richness          | 129254 [107885, 163289] | 128683 [102894, 157331] | 123937 [87304, 156408] | 0.559                  | n/a                     | n/a                     | n/a                        |
|         |                   | Shannon           | 10.3 [10, 10.6]         | 10.2 [9.9, 10.6]        | 10.1 [9.8, 10.6]       | 0.419                  | n/a                     | n/a                     | n/a                        |
|         | MGS               | Richness          | 57 [45, 78]             | 60 [45, 73]             | 56 [42, 71]            | 0.577                  | n/a                     | n/a                     | n/a                        |
|         |                   | Shannon           | 2.0 [1.6, 2.3]          | 1.9 [1.6, 2.4]          | 1.9 [1.4, 2.3]         | 0.832                  | n/a                     | n/a                     | n/a                        |
|         |                   | Faith's PD        | 27.2 [21.1, 33.6]       | 28.6 [21.7, 33.1]       | 25.2 [20.4, 31.1]      | 0.270                  | n/a                     | n/a                     | n/a                        |
|         | Genus             | Richness          | 25 [19, 32]             | 28 [20, 32]             | 23 [19, 30]            | 0.312                  | n/a                     | n/a                     | n/a                        |
| Shannon |                   | 1.4 [1.1, 1.7]    | 1.3 [0.9, 1.7]          | 1.3 [0.9, 1.7]          | 0.470                  | n/a                    | n/a                     | n/a                     |                            |

CG, control group (placebo supplement); Lo-EG, low-dose *B. infantis*,  $1.0 \times 10^8$  CFU; Hi-EG, high-dose *B. infantis*,  $1.8 \times 10^{10}$  CFU. Shannon diversity (Shannon), and MGS-level Faith's Phylogenetic distance (Faith's PD). Pairwise comparisons using Dunn's test were applied for measures significantly different in the Kruskal-Wallis test.

**Supplementary Table 10. PERMANOVA R<sup>2</sup> and p-values based on 1,000 permutations for overall and pairwise comparisons of Bray-Curtis dissimilarity and weighted UniFrac distance between groups at each visit.**

| Visit   | Comparisons    | Bray-Curtis    |              | Weighted UniFrac |              |
|---------|----------------|----------------|--------------|------------------|--------------|
|         |                | R <sup>2</sup> | p-value      | R <sup>2</sup>   | p-value      |
| Visit 1 | All            | 0.87%          | 0.560        | 0.92%            | 0.398        |
|         | CG vs Lo-EG    | 0.58%          | 0.654        | 1.22%            | 0.093        |
|         | CG vs Hi-EG    | 0.73%          | 0.405        | 0.78%            | 0.297        |
|         | Lo-EG vs Hi-EG | 0.66%          | 0.536        | 0.05%            | 0.988        |
| Visit 2 | All            | <b>4.93%</b>   | <b>0.001</b> | <b>3.1%</b>      | <b>0.012</b> |
|         | CG vs Lo-EG    | <b>5.13%</b>   | <b>0.001</b> | <b>2.94%</b>     | <b>0.007</b> |
|         | CG vs Hi-EG    | <b>5.00%</b>   | <b>0.001</b> | <b>3.52%</b>     | <b>0.012</b> |
|         | Lo-EG vs Hi-EG | 0.48%          | 0.713        | 0.18%            | 0.906        |
| Visit 3 | All            | <b>2.83%</b>   | <b>0.001</b> | 1.22%            | 0.216        |
|         | CG vs Lo-EG    | <b>2.71%</b>   | <b>0.001</b> | 1.26%            | 0.104        |
|         | CG vs Hi-EG    | <b>2.72%</b>   | <b>0.002</b> | 1.18%            | 0.144        |
|         | Lo-EG vs Hi-EG | 0.76%          | 0.341        | 0.19%            | 0.871        |
| Visit 4 | All            | <b>1.92%</b>   | <b>0.005</b> | 0.87%            | 0.427        |
|         | CG vs Lo-EG    | <b>1.81%</b>   | <b>0.003</b> | 0.82%            | 0.273        |
|         | CG vs Hi-EG    | <b>1.95%</b>   | <b>0.006</b> | 0.82%            | 0.269        |
|         | Lo-EG vs Hi-EG | 0.46%          | 0.768        | 0.29%            | 0.833        |

CG, control group (placebo supplement); Lo-EG, low-dose *B. infantis*,  $1.0 \times 10^8$  CFU; Hi-EG, high-dose *B. infantis*,  $1.8 \times 10^{10}$  CFU.

**Supplementary Table 11. Significantly different taxa between groups per visit. P-values were adjusted using FDR applied to each taxonomical rank separately. No taxa were significantly different at Visit 1.**

| Visit   | Rank  | Taxon                      | Median abundance (%)<br>[IQR1; IQR3] |                   |                    | Kruskal-Wallis<br>adjusted<br>p-value | Dunn's test adjusted p-value |                       |                  |
|---------|-------|----------------------------|--------------------------------------|-------------------|--------------------|---------------------------------------|------------------------------|-----------------------|------------------|
|         |       |                            | CG                                   | Lo-EG             | Hi-EG              |                                       | CG v<br>Lo-EG                | CG v<br>Hi-EG         | Lo-EG v<br>Hi-EG |
| Visit 2 | MGS   | <i>B. infantis</i>         | 0 [0; 0.005]                         | 22.7 [4.3; 47.8]  | 21.6 [3.8; 51.5]   | 3.4*10 <sup>-12</sup>                 | 1.1*10 <sup>-11</sup>        | 1.1*10 <sup>-11</sup> | 0.973            |
|         | genus | <i>Bifidobacterium</i>     | 41.5 [12.5; 70.0]                    | 69.3 [30.7; 83.8] | 66.4 [34.8; 82.7]  | 0.086                                 | 0.0061                       | 0.0040                | 0.709            |
|         | genus | <i>Klebsiella</i>          | 3.85 [0.95; 15.4]                    | 0.77 [0.14; 6.2]  | 1.05 [0.098; 10.4] | 0.086                                 | 0.0029                       | 0.019                 | 0.451            |
|         | genus | <i>Mediterraneibacter</i>  | 0.0066 [0; 0.60]                     | 0 [0; 0.18]       | 0.0023 [0; 0.017]  | 0.086                                 | 0.243                        | 0.0027                | 0.046            |
|         | -     | Infant-type Bifidobacteria | 31.0 [1.3; 67.4]                     | 59.0 [23.9; 83.0] | 59.9 [26.1; 82.3]  | 0.00038                               | 0.0008<br>0                  | 0.0002<br>7           | 0.616            |
| Visit 3 | MGS   | <i>B. infantis</i>         | 0 [0; 9.8]                           | 21.8 [1.0; 53.7]  | 11.7 [1.7; 45.8]   | 3.1*10 <sup>-7</sup>                  | 1.7*10 <sup>-8</sup>         | 2.9*10 <sup>-7</sup>  | 0.574            |
|         | -     | Infant-type Bifidobacteria | 41.9 [8.8; 67.9]                     | 61.8 [19.6; 81.0] | 61.4 [25.0; 79.7]  | 0.038                                 | 0.013                        | 0.013                 | 0.949            |
| Visit 4 | MGS   | <i>B. infantis</i>         | 0 [0; 1.5]                           | 14.6 [0.02; 44.1] | 11.9 [0.05; 51.4]  | 0.00020                               | 8.8*10 <sup>-6</sup>         | 8.8*10 <sup>-6</sup>  | 0.982            |
|         | MGS   | <i>Lachnospiraceae sp.</i> | 0.0 [0.0; 0.0]                       | 0.0 [0.0; 0.0]    | 0.0 [0.0; 0.0]     | 0.0082                                | 0.0008<br>2                  | 0.0001<br>4           | 0.512            |
|         | -     | Infant-type Bifidobacteria | 48.2 [12.9; 63.6]                    | 52.2 [22.8; 76.5] | 60.8 [28.8; 80.7]  | 0.0832                                | 0.038                        | 0.034                 | 0.743            |

CG, control group (placebo supplement); Lo-EG, low-dose *B. infantis*, 1.0 x 10<sup>8</sup> CFU; Hi-EG, high-dose *B. infantis*, 1.8 x 10<sup>10</sup> CFU. IQR, Inter Quartile Range. P-values were adjusted using FDR applied to each taxonomical rank separately. No taxa were significantly different at Visit 1.

**Supplementary Table 12. Prevalence of pathogenic species identified by detection of specific virulence factors among groups and visits.**

| <b>Pathogen</b>                 | <b>Visit</b> | <b>CG</b> | <b>Lo-EG</b> | <b>Hi-EG</b> |
|---------------------------------|--------------|-----------|--------------|--------------|
| <i>Campylobacter</i> spp.       | V1           | 0         | 1 (1.4%)     | 0            |
|                                 | V2           | 0         | 1 (1.4%)     | 2 (2.9%)     |
|                                 | V3           | 4 (5.5%)  | 0            | 0            |
|                                 | V4           | 0         | 1 (1.4%)     | 0            |
| <i>Clostridioides difficile</i> | V1           | 2 (2.7%)  | 0            | 1 (1.4%)     |
|                                 | V2           | 10 (13%)  | 4 (5.5%)     | 4 (5.8%)     |
|                                 | V3           | 14 (19%)  | 7 (9.6%)     | 7 (10%)      |
|                                 | V4           | 17 (23%)  | 14 (19%)     | 10 (14%)     |
| <i>Clostridium perfringens</i>  | V1           | 1 (1.4%)  | 0            | 0            |
|                                 | V2           | 0         | 1 (1.4%)     | 0            |
|                                 | V3           | 0         | 0            | 0            |
|                                 | V4           | 0         | 0            | 0            |
| <i>Escherichia coli</i>         | V1           | 1 (1.4%)  | 0            | 0            |
|                                 | V2           | 1 (1.3%)  | 1 (1.4%)     | 0            |
|                                 | V3           | 0         | 0            | 3 (4.3%)     |
|                                 | V4           | 4 (5.3%)  | 2 (2.7%)     | 3 (4.3%)     |

CG, control group (placebo supplement); Lo-EG, low-dose *B. infantis*,  $1.0 \times 10^8$  CFU; Hi-EG, high-dose *B. infantis*,  $1.8 \times 10^{10}$  CFU. Numbers in brackets refer to the percentage of all infants in the group at the visit.

**Supplementary Table 13. Chi-squared test p-values for overall and pairwise differences in FCT profiles between samples stratified according to *B. infantis* strain colonization at V4.**

| <b>Visit</b> | <b>p-value (overall)</b> | <b>p-value (pairwise;<br/>LMG11588 vs No B.<br/>infantis)</b> | <b>p-value (pairwise;<br/>Other B. infantis vs No<br/>B. infantis)</b> | <b>p-value (pairwise;<br/>Other B. infantis vs<br/>LMG11588)</b> |
|--------------|--------------------------|---------------------------------------------------------------|------------------------------------------------------------------------|------------------------------------------------------------------|
| Visit 1      | 0.009                    | 0.020                                                         | $9.47 \times 10^{-4}$                                                  | 0.246                                                            |
| Visit 2      | $2.23 \times 10^{-4}$    | 0.001                                                         | $7.11 \times 10^{-5}$                                                  | 0.381                                                            |
| Visit 3      | $2.61 \times 10^{-4}$    | $8.48 \times 10^{-4}$                                         | $2.27 \times 10^{-4}$                                                  | 0.334                                                            |
| Visit 4      | $6.12 \times 10^{-7}$    | $5.6 \times 10^{-5}$                                          | $2.34 \times 10^{-5}$                                                  | 0.101                                                            |
